# Supplementary material
Source: ML conference proceedings conference paper supplement (https://openaccess.thecvf.com/content/ICCV2023/html/Zohaib_SC3K_Self-supervised_and_ICCV_2023_paper.html)
Supplement: Supplementary file 2 [file Zohaib_SC3K_Self-supervised_and_ICCV_2023_supplemental.zip]

Archive with 2 entries (2 files):
- 09727-supp.pdf
- 09727_supp.mp4
